# Supplementary material for: Longitudinal patient-reported outcomes in patients receiving chimeric antigen receptor T-cell therapy
Source: PubMed Central journal article supplement — Blood Adv. 2023 Apr 7;7(14):3541–50. doi: 10.1182/bloodadvances.2022009117 (PMC10368828; doi:10.1182/bloodadvances.2022009117), 2023-04-07

**Supplemental Table 1: Means and Standard Deviations of All Outcome Measures by Time Point**

| <b>Patient-reported Outcome</b> | <b>Time Point*</b> | <b>Number of Observations</b> | <b>Mean</b> | <b>Standard Deviation</b> |
|---------------------------------|--------------------|-------------------------------|-------------|---------------------------|
| QOL: FACT-G                     | Baseline           | 98                            | 76.1        | 17.1                      |
| QOL: FACT-G                     | 1 Week             | 95                            | 71.1        | 16.9                      |
| QOL: FACT-G                     | 1 Month            | 85                            | 76.8        | 15.8                      |
| QOL: FACT-G                     | 3 Months           | 80                            | 81.3        | 16.4                      |
| QOL: FACT-G                     | 6 Months           | 72                            | 81.5        | 16.2                      |
| Anxiety: HADS-A                 | Baseline           | 100                           | 5.58        | 4.17                      |
| Anxiety: HADS-A                 | 1 Week             | 95                            | 4.73        | 4.28                      |
| Anxiety: HADS-A                 | 1 Month            | 86                            | 4.93        | 3.91                      |
| Anxiety: HADS-A                 | 3 Months           | 80                            | 4.84        | 3.90                      |
| Anxiety: HADS-A                 | 6 Months           | 72                            | 4.20        | 3.62                      |
| Depression: HADS-D              | Baseline           | 100                           | 5.47        | 4.07                      |
| Depression: HADS-D              | 1 Week             | 95                            | 6.17        | 4.97                      |
| Depression: HADS-D              | 1 Month            | 86                            | 5.83        | 4.58                      |
| Depression: HADS-D              | 3 Months           | 80                            | 4.72        | 3.55                      |
| Depression: HADS-D              | 6 Months           | 72                            | 4.43        | 3.86                      |
| Depression: PHQ-9               | Baseline           | 99                            | 5.74        | 5.29                      |
| Depression: PHQ-9               | 1 Week             | 95                            | 6.76        | 5.55                      |
| Depression: PHQ-9               | 1 Month            | 84                            | 5.36        | 4.11                      |
| Depression: PHQ-9               | 3 Months           | 80                            | 4.15        | 3.82                      |
| Depression: PHQ-9               | 6 Months           | 72                            | 4.23        | 4.27                      |
| PTSD Symptoms: PCL              | Baseline           | 98                            | 29.0        | 9.39                      |
| PTSD Symptoms: PCL              | 1 Month            | 86                            | 26.7        | 8.55                      |
| PTSD Symptoms: PCL              | 3 Months           | 80                            | 27.5        | 9.00                      |
| PTSD Symptoms: PCL              | 6 Months           | 72                            | 27.2        | 9.77                      |

Quality of life: QOL; PTSD: Post-traumatic stress disorder

\*1 week, 1 month, 3 months, and 6 months time points refer to time post CAR-T infusion.

**Supplemental Figure 1: Consort Diagram**

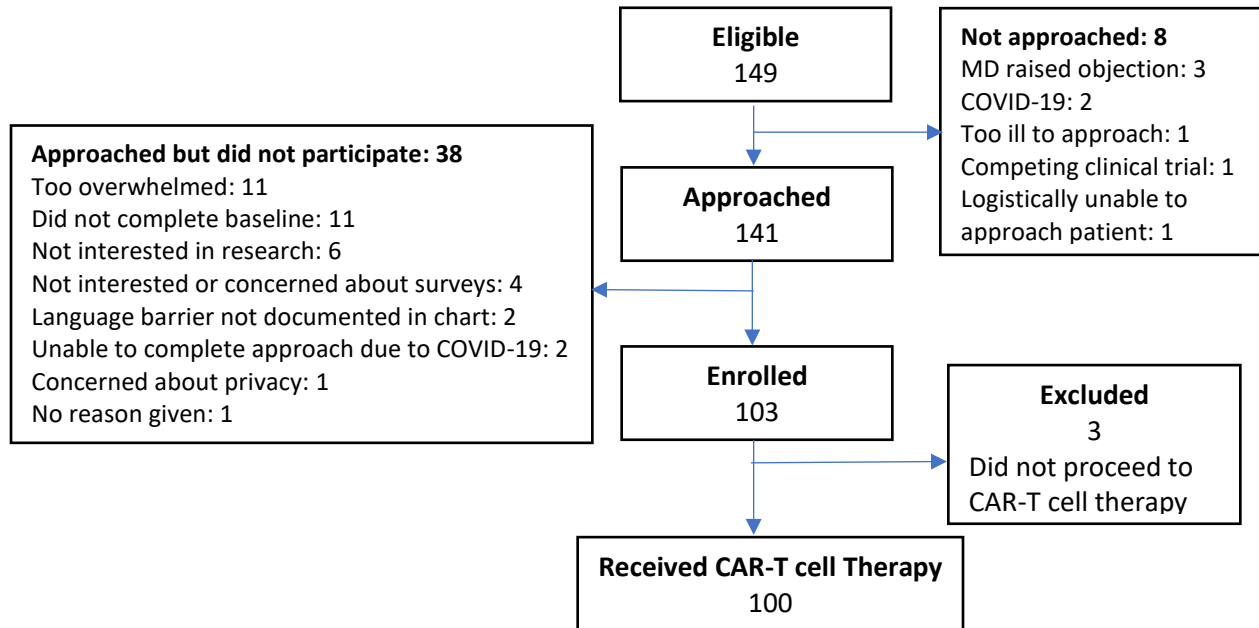

Supplement: BLOODA_ADV-2022-009117-mmc1.pdf [file BLOODA_ADV-2022-009117-mmc1.pdf]
